# Supplementary material for: Supramolecular architecture of crystals of fused hydrocarbons based on topology of intermolecular interactions
Source: Royal Society of Chemistry journal article supplement (doi:10.1039/c2ce06336k), 2012-01-01
Supplement: c2ce06336k.pdf [file c2ce06336k.pdf]

## Electronic Supplementary Information

### **Supramolecular architecture of crystals of saturated fused hydrocarbons based on topology of intermolecular interactions**

Viktoriya V. Dyakonenko<sup>1</sup>, Andrey V. Maleev<sup>2</sup>, Oleg V. Shishkin<sup>1,3\*</sup>,

<sup>1</sup> STC “Institute for Single Crystals” National Academy of Science of Ukraine, 60 Lenina ave.,  
Kharkiv, 61001, Ukraine

<sup>2</sup> Vladimir State University, 87 Gorky str., Vladimir, 600000, Russian Federation

<sup>3</sup> Department of Inorganic Chemistry, V. N. Karazin Kharkiv National University, 4 Svobody sq.,  
Kharkiv 61077, Ukraine

\*. E-mail: shishkin@xray.isc.kharkov.com

Table S1. Symmetry codes of neighboring molecules for basic molecule located in asymmetric part of unit cell, energy of interaction of basic molecule with neighboring molecule ( $E_i$ ) and its contribution into total energy of interactions of basic molecule with all molecules belonging to its first coordination sphere ( $EN_i$ ), distance to geometrical center of basic molecule ( $R_i$ ) and length of segment of line for visualization of interaction between molecules ( $L_i$ ) for crystal structure **1**. Molecules belonging to the basic structural motif are highlighted in bold.

| Neighbor | Symmetry code         | $E_i$ , kcal/mol | $EN_i$ , %  | $R_i$ , Å    | $L_i$ , Å    |
|----------|-----------------------|------------------|-------------|--------------|--------------|
| 1        | 1-x, -y, 1-z          | -2,74            | 10.6        | 5.905        | 2.715        |
| <b>2</b> | <b>-1+x, y, z</b>     | <b>-2,98</b>     | <b>11.5</b> | <b>5.511</b> | <b>2.756</b> |
| <b>3</b> | <b>1+x, y, z</b>      | <b>-2,98</b>     | <b>11.5</b> | <b>5.511</b> | <b>2.756</b> |
| 4        | 2-x, -y, 2-z          | -2,39            | 9.3         | 6.089        | 2.442        |
| 5        | 0.5+x, 0.5-y, 0.5+z   | -2,29            | 8.9         | 5.948        | 2.285        |
| 6        | -0.5+x, 0.5-y, -0.5+z | -2,29            | 8.9         | 5.948        | 2.285        |
| 7        | -0.5+x, 0.5-y, 0.5+z  | -1.74            | 6.7         | 6.718        | 1.961        |
| 8        | 0.5+x, 0.5-y, -0.5+z  | -1.74            | 6.7         | 6.718        | 1.961        |
| 9        | x, y, -1+z            | -2.14            | 8.3         | 6.799        | 2.441        |
| 10       | x, y, 1+z             | -2.14            | 8.3         | 6.799        | 2.441        |
| 11       | 1-x, -y, 2-z          | -1.48            | 5.7         | 6.432        | 1.597        |
| 12       | 2-x, -y, 1-z          | -0.90            | 3.5         | 7.076        | 1.069        |

Table S2. Symmetry codes of neighboring molecules for basic molecule located in asymmetric part of unit cell, energy of interaction of basic molecule with neighboring molecule ( $E_i$ ) and its contribution into total energy of interactions of basic molecule with all molecules belonging to its first coordination sphere ( $EN_i$ ), distance to geometrical center of basic molecule ( $R_i$ ) and length of segment of line for visualization of interaction between molecules ( $L_i$ ) for crystal structure **2**. Molecules belonging to the basic structural motif are highlighted in bold.

| Neighbor  | Symmetry code             | $E_i$ , kcal/mol | $EN_i$ , %  | $R_i$ , Å    | $L_i$ , Å    |
|-----------|---------------------------|------------------|-------------|--------------|--------------|
| <b>1</b>  | <b>1-x, -0.5+y, 0.5-z</b> | <b>-2.74</b>     | <b>12.2</b> | <b>5.256</b> | <b>1.967</b> |
| <b>2</b>  | <b>1-x, 0.5+y, 0.5-z</b>  | <b>-2.74</b>     | <b>12.2</b> | <b>5.256</b> | <b>1.967</b> |
| <b>3</b>  | <b>2-x, -y, 1-z</b>       | <b>-3.66</b>     | <b>16.3</b> | <b>4.739</b> | <b>2.370</b> |
| 4         | x, -0.5-y, -0.5+z         | -1.14            | 5.1         | 5.973        | 0.930        |
| 5         | x, -0.5-y, 0.5+z          | -1.14            | 5.1         | 5.973        | 0.930        |
| 6         | 2-x, -0.5+y, 0.5-z        | -1.97            | 8.8         | 5.675        | 1.527        |
| 7         | 2-x, 0.5+y, 0.5-z         | -1.97            | 8.8         | 5.675        | 1.527        |
| 8         | x, 0.5-y, -0.5+z          | -1.14            | 5.1         | 5.615        | 0.874        |
| 9         | x, 0.5-y, 0.5+z           | -1.14            | 5.1         | 5.615        | 0.874        |
| <b>10</b> | <b>x, -1+y, z</b>         | <b>-1.79</b>     | <b>8.0</b>  | <b>5.956</b> | <b>1.456</b> |
| <b>11</b> | <b>x, 1+y, z</b>          | <b>-1.79</b>     | <b>8.0</b>  | <b>5.956</b> | <b>1.456</b> |
| 12        | 1-x, -y, 1-z              | -0.84            | 3.7         | 6.192        | 0.711        |
| <b>13</b> | <b>2-x, -1-y, 1-z</b>     | <b>-0.40</b>     | <b>1.8</b>  | <b>7.061</b> | <b>0.386</b> |

Table S3. Symmetry codes of neighboring molecules for basic molecule located in asymmetric part of unit cell, energy of interaction of basic molecule with neighboring molecule ( $E_i$ ) and its contribution into total energy of interactions of basic molecule with all molecules belonging to its first coordination sphere ( $EN_i$ ), distance to geometrical center of basic molecule ( $R_i$ ) and length of segment of line for visualization of interaction between molecules ( $L_i$ ) for crystal structure **3**. Molecules belonging to the basic structural motif are highlighted in bold.

| Neighbor  | Symmetry code             | $E_i$ , kcal/mol | $EN_i$ , %  | $R_i$ , Å    | $L_i$ , Å    |
|-----------|---------------------------|------------------|-------------|--------------|--------------|
| 1         | -x, -0.5+y, 1.5-z         | -2.31            | 9.0         | 5.442        | 1.871        |
| 2         | -x, 0.5+y, 1.5-z          | -2.31            | 9.0         | 5.442        | 1.871        |
| <b>3</b>  | <b>1-x, -y, 2-z</b>       | <b>-3.36</b>     | <b>13.1</b> | <b>6.082</b> | <b>3.041</b> |
| <b>4</b>  | <b>1-x, -0.5+y, 1.5-z</b> | <b>-3.32</b>     | <b>12.9</b> | <b>5.501</b> | <b>2.718</b> |
| <b>5</b>  | <b>1-x, 0.5+y, 1.5-z</b>  | <b>-3.32</b>     | <b>12.9</b> | <b>5.501</b> | <b>2.718</b> |
| <b>6</b>  | <b>x, -1+y, z</b>         | <b>-2.37</b>     | <b>9.2</b>  | <b>5.940</b> | <b>2.095</b> |
| <b>7</b>  | <b>x, 1+y, z</b>          | <b>-2.37</b>     | <b>9.2</b>  | <b>5.940</b> | <b>2.095</b> |
| 8         | -x, -y, 1-z               | -0.98            | 3.8         | 6.575        | 0.959        |
| <b>9</b>  | <b>x, 0.5-y, -0.5+z</b>   | <b>-1.53</b>     | <b>5.9</b>  | <b>6.391</b> | <b>1.455</b> |
| <b>10</b> | <b>x, 0.5-y, 0.5+z</b>    | <b>-1.53</b>     | <b>5.9</b>  | <b>6.391</b> | <b>1.455</b> |
| <b>11</b> | <b>x, -0.5-y, -0.5+z</b>  | <b>-0.99</b>     | <b>3.8</b>  | <b>6.541</b> | <b>0.964</b> |
| <b>12</b> | <b>x, -0.5-y, 0.5+z</b>   | <b>-0.99</b>     | <b>3.8</b>  | <b>6.541</b> | <b>0.964</b> |
| 13        | 1-x, 1-y, 2-z             | -0.36            | 1.4         | 8.386        | 0.449        |

Table S4. Symmetry codes of neighboring molecules for basic molecule located in asymmetric part of unit cell, energy of interaction of basic molecule with neighboring molecule ( $E_i$ ) and its contribution into total energy of interactions of basic molecule with all molecules belonging to its first coordination sphere ( $EN_i$ ), distance to geometrical center of basic molecule ( $R_i$ ) and length of segment of line for visualization of interaction between molecules ( $L_i$ ) for crystal structure **4**. Molecules belonging to the basic structural motif are highlighted in bold.

| Neighbor | Symmetry code      | $E_i$ , kcal/mol | $EN_i$ , %  | $R_i$ , Å    | $L_i$ , Å    |
|----------|--------------------|------------------|-------------|--------------|--------------|
| <b>1</b> | <b>-1+x, y, z</b>  | <b>-6.70</b>     | <b>16.5</b> | <b>5.990</b> | <b>2.995</b> |
| <b>2</b> | <b>1+x, y, z</b>   | <b>-6.70</b>     | <b>16.5</b> | <b>5.990</b> | <b>2.995</b> |
| 3        | 1-x, 1-y, 1-z      | -3.63            | 9.0         | 8.106        | 2.196        |
| 4        | -x, 1-y, 1-z       | -2.78            | 6.9         | 8.336        | 1.729        |
| 5        | -x, -0.5+y, 0.5-z  | -3.29            | 8.1         | 8.692        | 2.134        |
| 6        | -x, 0.5+y, 0.5-z   | -3.29            | 8.1         | 8.692        | 2.134        |
| 7        | 1-x, -0.5+y, 0.5-z | -2.72            | 6.7         | 9.155        | 1.858        |
| 8        | 1-x, 0.5+y, 0.5-z  | -2.72            | 6.7         | 9.155        | 1.858        |
| 9        | x, -1+y, z         | -1.80            | 4.4         | 9.476        | 1.273        |
| 10       | x, 1+y, z          | -1.80            | 4.4         | 9.476        | 1.273        |
| 11       | -1+x, 1+y, z       | -1.65            | 4.1         | 11.211       | 1.380        |
| 12       | -x, 2-y, 1-z       | -1.79            | 4.4         | 11.298       | 1.509        |
| 13       | 1+x, -1+y, z       | -1.65            | 4.1         | 11.211       | 1.380        |

Table S5. Symmetry codes of neighboring molecules for basic molecule located in asymmetric part of unit cell, energy of interaction of basic molecule with neighboring molecule ( $E_i$ ) and its contribution into total energy of interactions of basic molecule with all molecules belonging to its first coordination sphere ( $EN_i$ ), distance to geometrical center of basic molecule ( $R_i$ ) and length of segment of line for visualization of interaction between molecules ( $L_i$ ) for crystal structure **5**. Molecules belonging to primary and secondary basic structural motifs are highlighted in bold and italic, respectively.

| Neighbor | Symmetry code                  | $E_i$ , kcal/mol    | $EN_i$ , %         | $R_i$ , Å           | $L_i$ , Å           |
|----------|--------------------------------|---------------------|--------------------|---------------------|---------------------|
| <b>1</b> | <b><i>x, 0.5-y, -0.5+z</i></b> | <b><i>-5.60</i></b> | <b><i>15.1</i></b> | <b><i>6.680</i></b> | <b><i>3.340</i></b> |
| <b>2</b> | <b><i>x, 0.5-y, 0.5+z</i></b>  | <b><i>-5.60</i></b> | <b><i>15.1</i></b> | <b><i>6.680</i></b> | <b><i>3.340</i></b> |
| 3        | <i>-1-x, -0.5+y, 0.5-z</i>     | <i>-3.99</i>        | <i>10.8</i>        | <i>8.081</i>        | <i>2.879</i>        |
| 4        | <i>-1-x, 0.5+y, 0.5-z</i>      | <i>-3.99</i>        | <i>10.8</i>        | <i>8.081</i>        | <i>2.879</i>        |
| 5        | <i>-1-x, 1-y, 1-z</i>          | <i>-3.28</i>        | <i>8.9</i>         | <i>7.516</i>        | <i>2.201</i>        |
| 6        | <i>-x, 1-y, 1-z</i>            | <i>-2.32</i>        | <i>6.2</i>         | <i>8.398</i>        | <i>1.740</i>        |
| 7        | <i>-1+x, y, z</i>              | <i>-1.90</i>        | <i>5.1</i>         | <i>8.904</i>        | <i>1.511</i>        |
| 8        | <i>1+x, y, z</i>               | <i>-1.90</i>        | <i>5.1</i>         | <i>8.904</i>        | <i>1.511</i>        |
| 9        | <i>-1-x, 1-y, -z</i>           | <i>-1.59</i>        | <i>4.3</i>         | <i>9.384</i>        | <i>1.332</i>        |
| 10       | <i>-x, -0.5+y, 0.5-z</i>       | <i>-1.54</i>        | <i>4.2</i>         | <i>10.482</i>       | <i>1.441</i>        |
| 11       | <i>-x, 0.5+y, 0.5-z</i>        | <i>-1.54</i>        | <i>4.2</i>         | <i>10.482</i>       | <i>1.441</i>        |
| 12       | <i>-1+x, 0.5-y, -0.5+z</i>     | <i>-1.47</i>        | <i>4.0</i>         | <i>9.664</i>        | <i>1.268</i>        |
| 13       | <i>1+x, 0.5-y, 0.5+z</i>       | <i>-1.47</i>        | <i>4.0</i>         | <i>9.664</i>        | <i>1.268</i>        |
| 14       | <i>-x, -y, 1-z</i>             | <i>-0.84</i>        | <i>2.3</i>         | <i>12.076</i>       | <i>0.906</i>        |
